# Supplementary material
Source: publisher figshare collection journal article supplement (https://karger.figshare.com/ndownloader/files/16289753)

## Supplemental figures

Figure S1. Flow chart showing studies selection process.

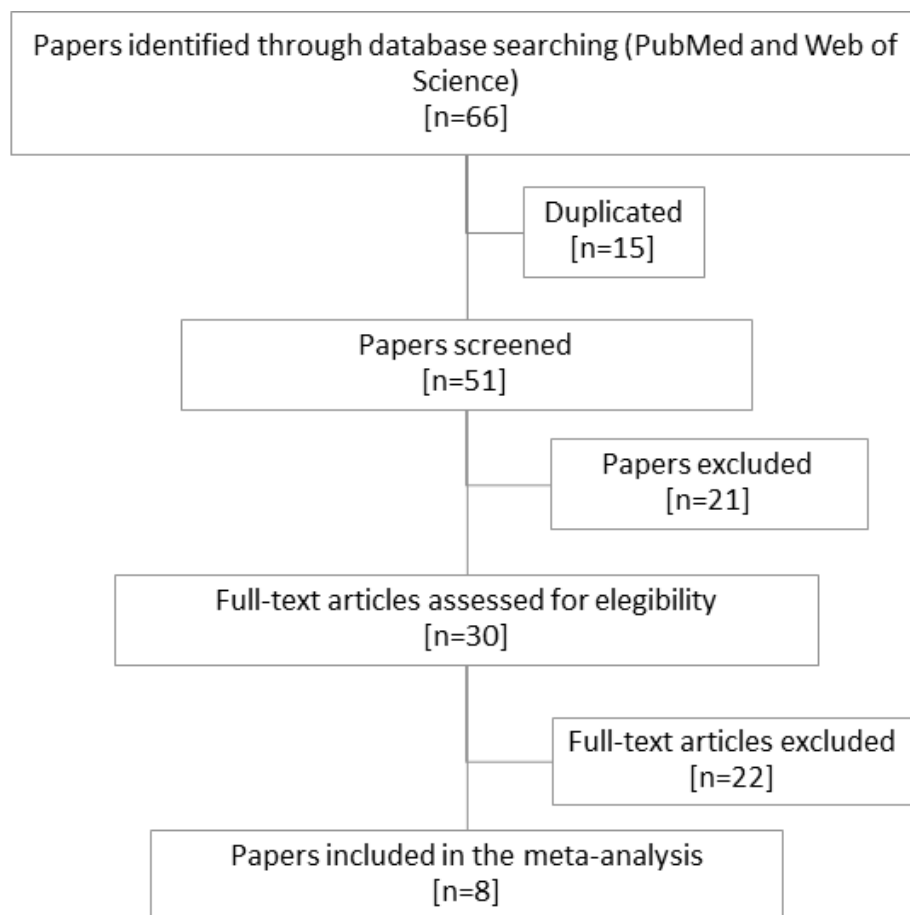

Figure S2. Forest plot for sensitivity and specificity for each study and pooled sensitivity and specificity for ROMA (A) and RMI (B) in premenopausal women.

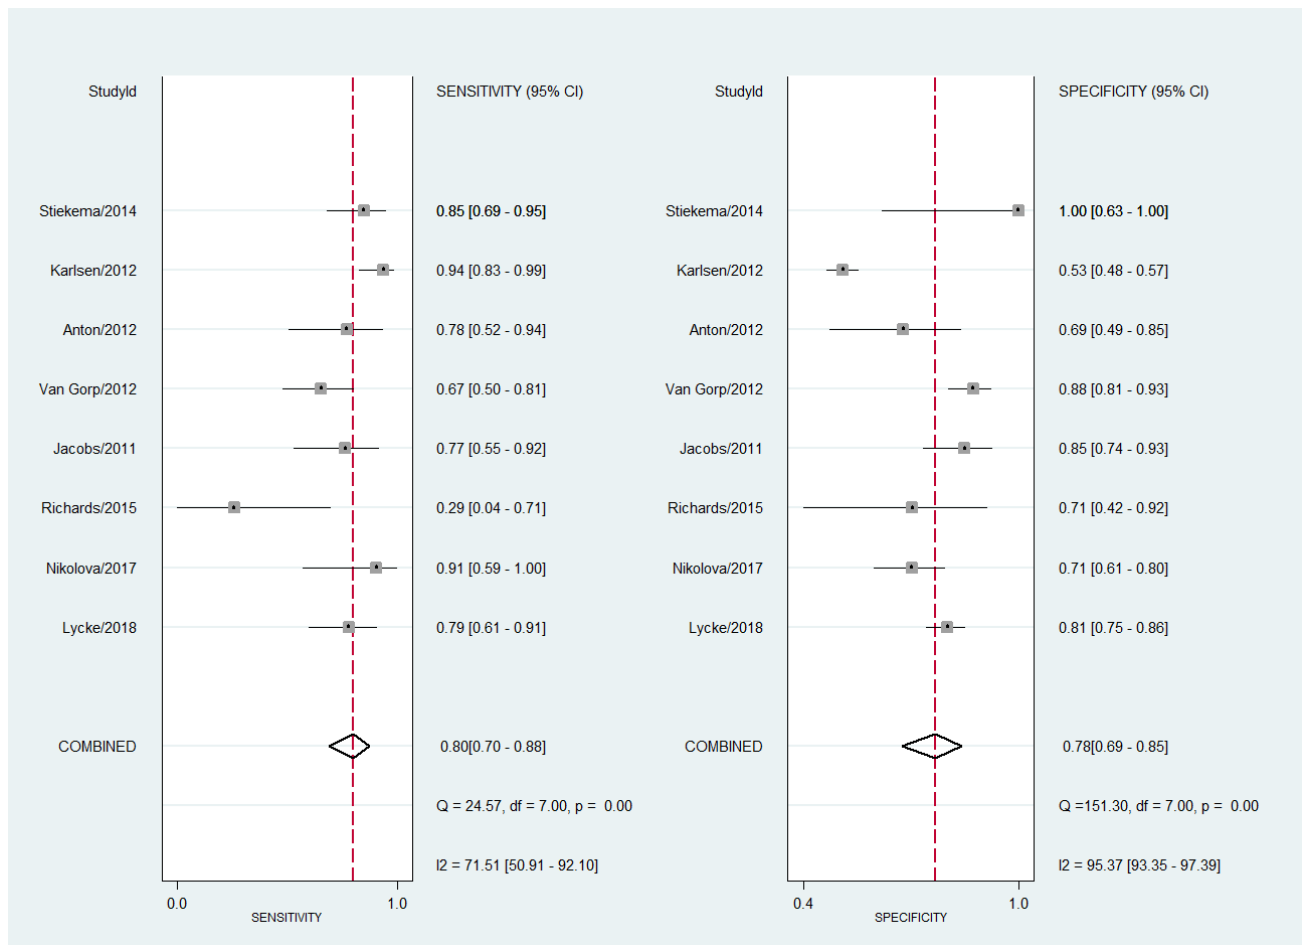

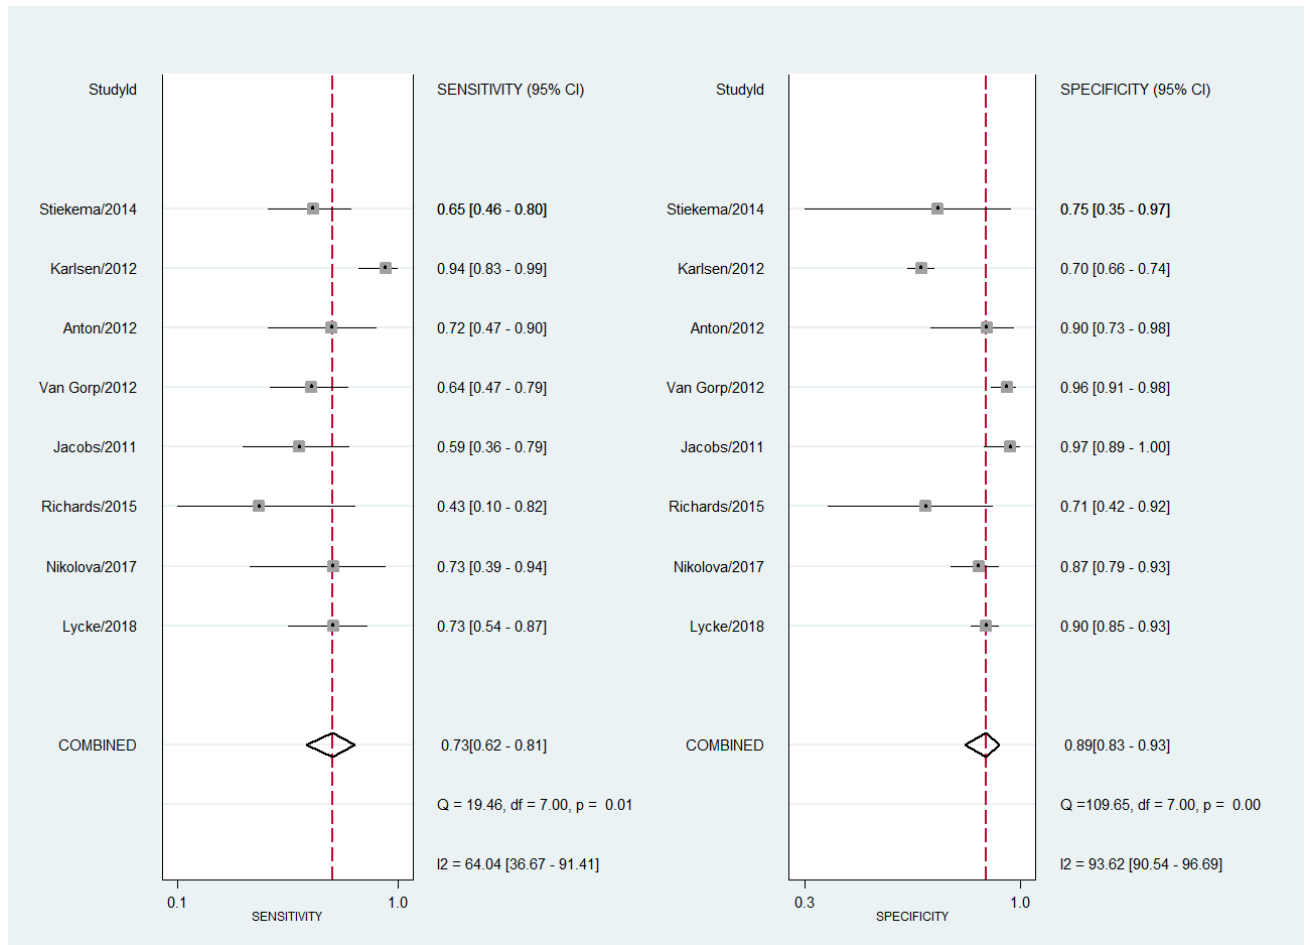

Figure S3. Fagan nomogram for detecting ovarian cancer for ROMA (A) and RMI (B) in premenopausal women.

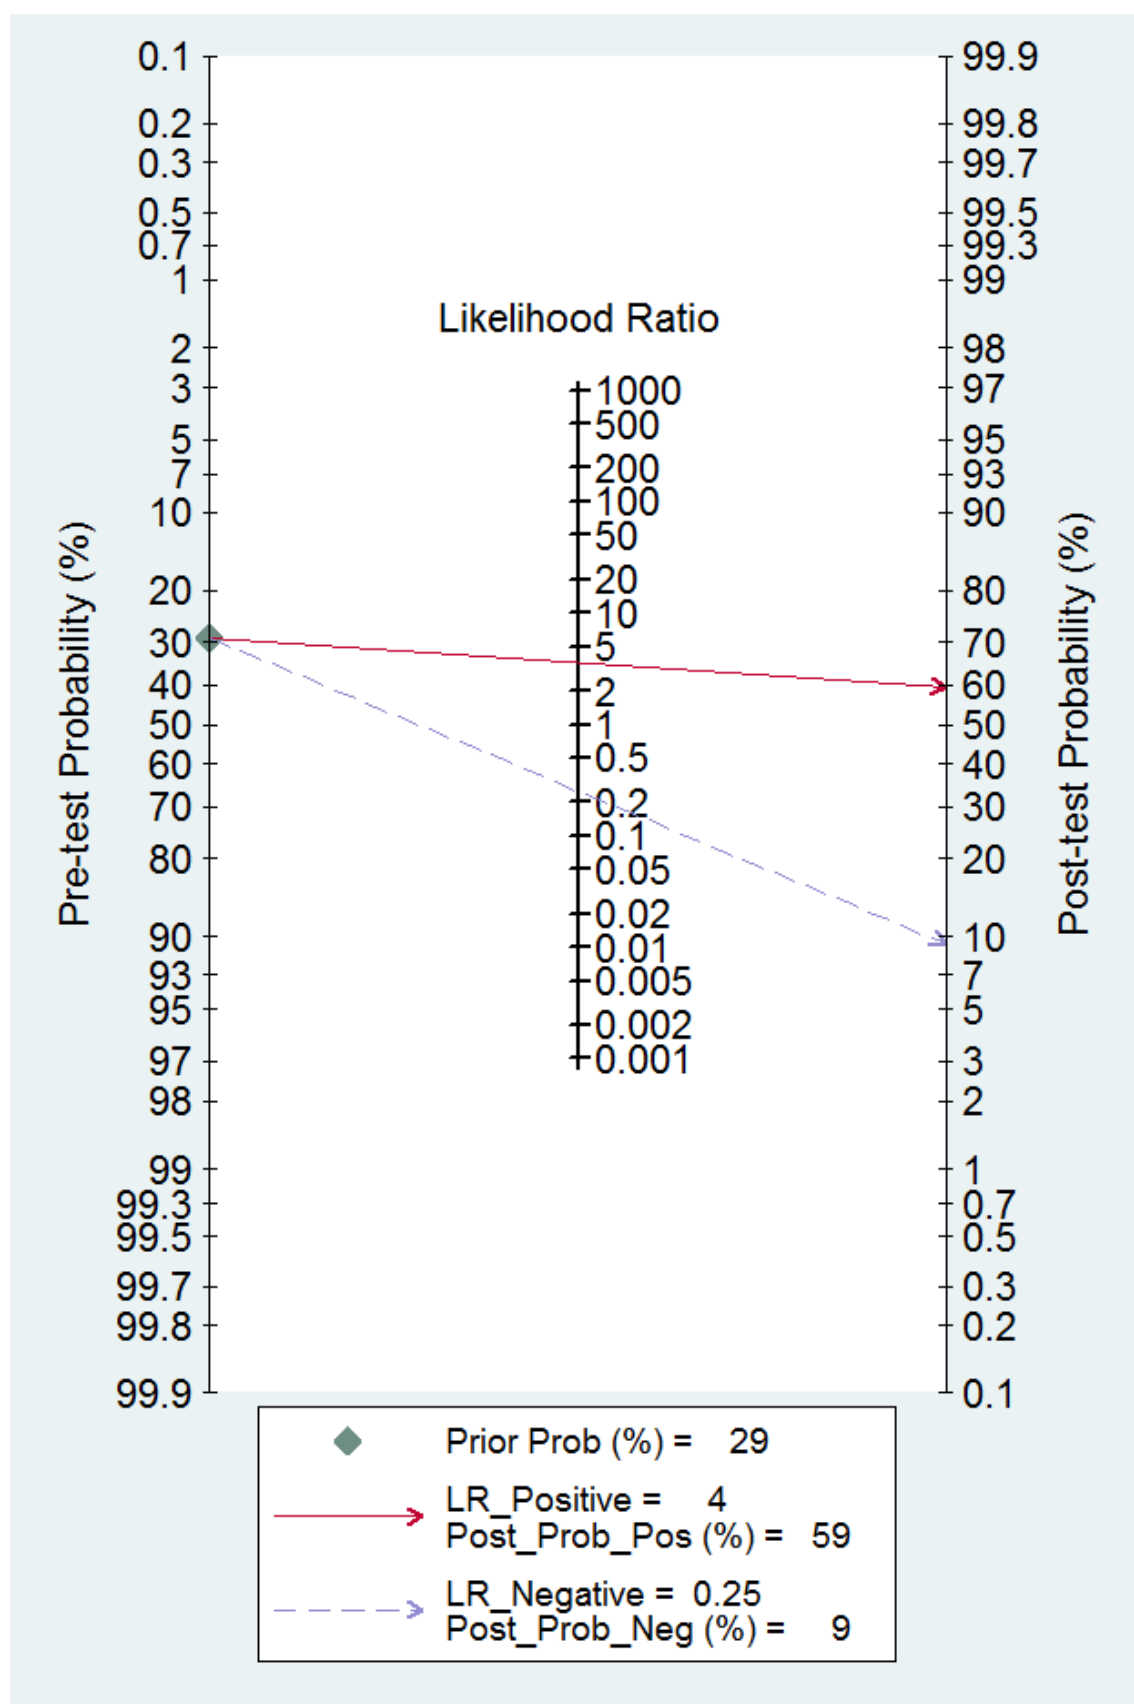

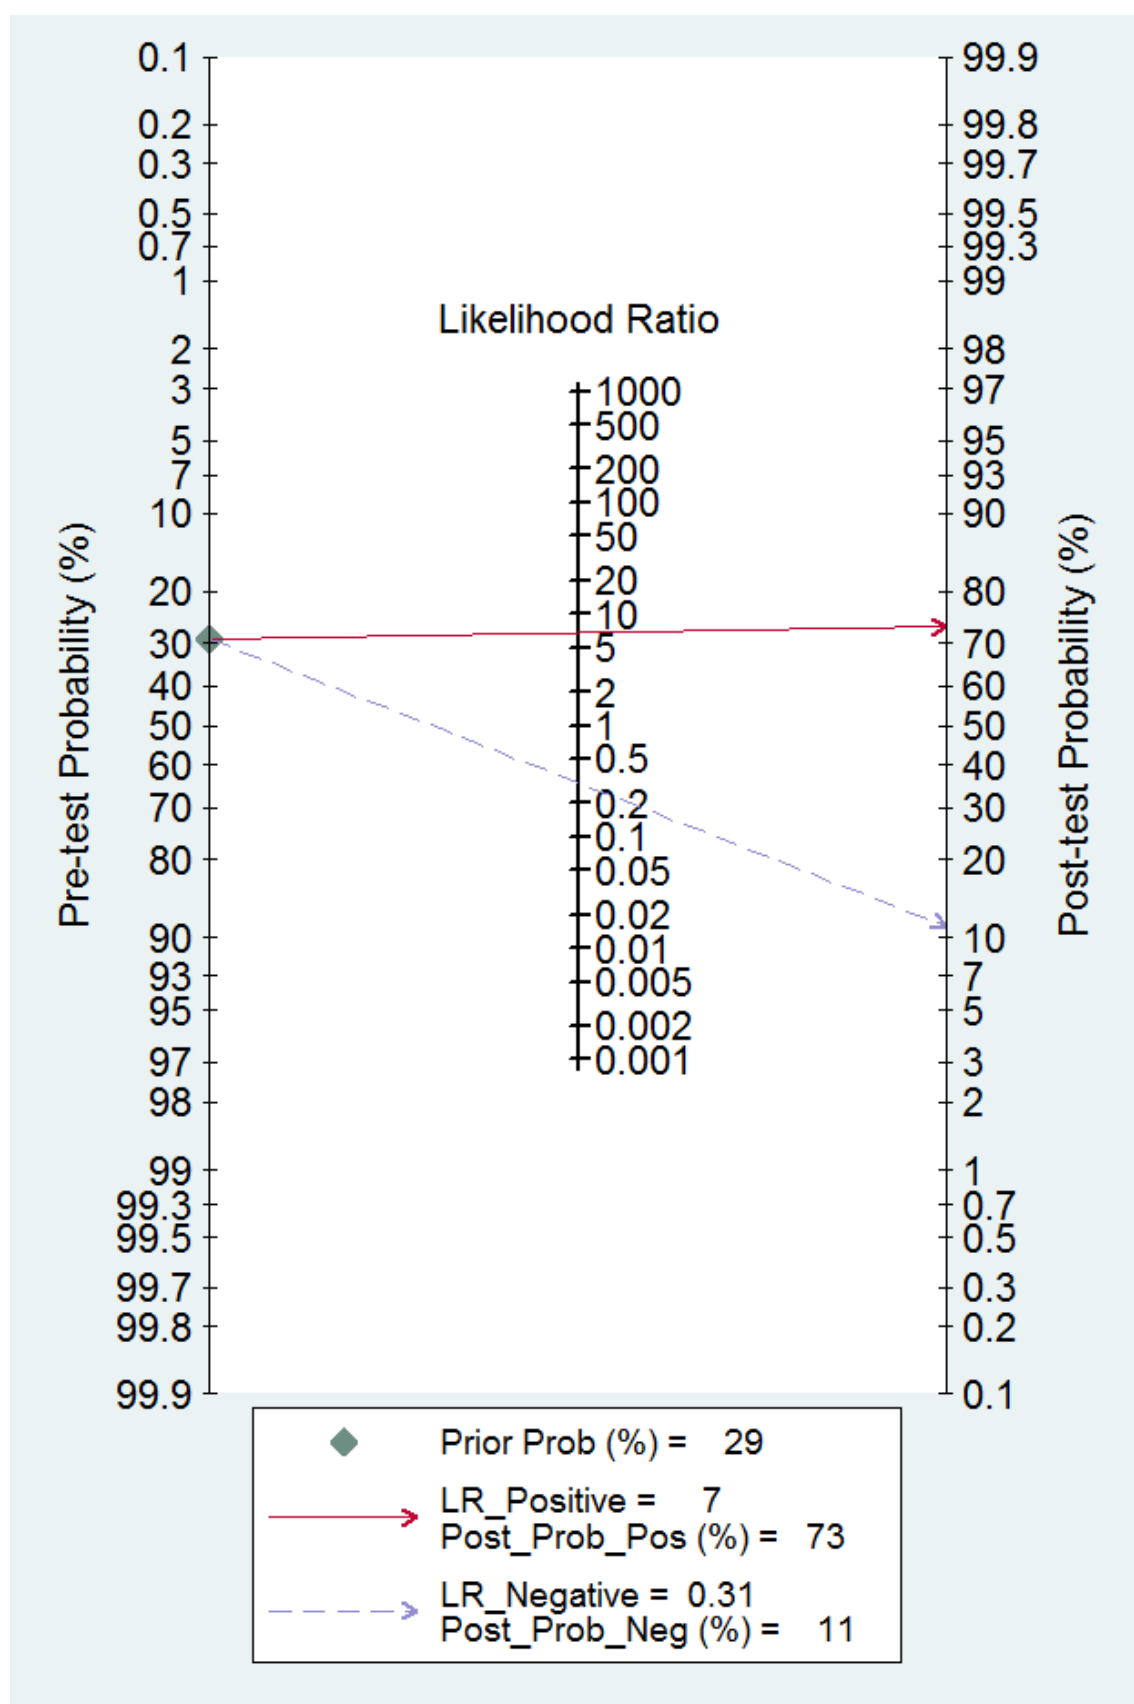

Figure S4. Forest plot for sensitivity and specificity for each study and pooled sensitivity and specificity for ROMA (A) and RMI (B) in postmenopausal women.

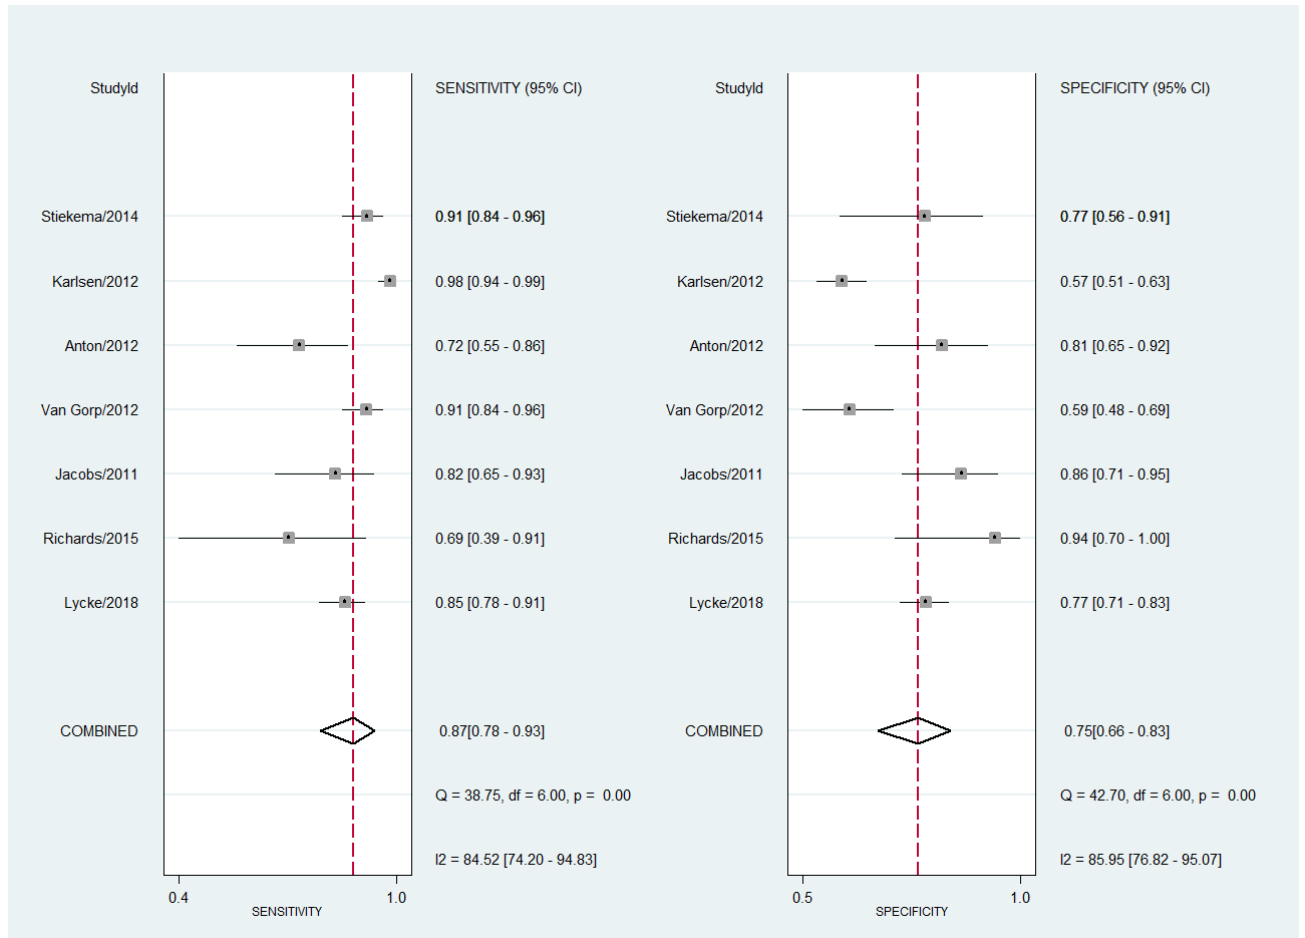

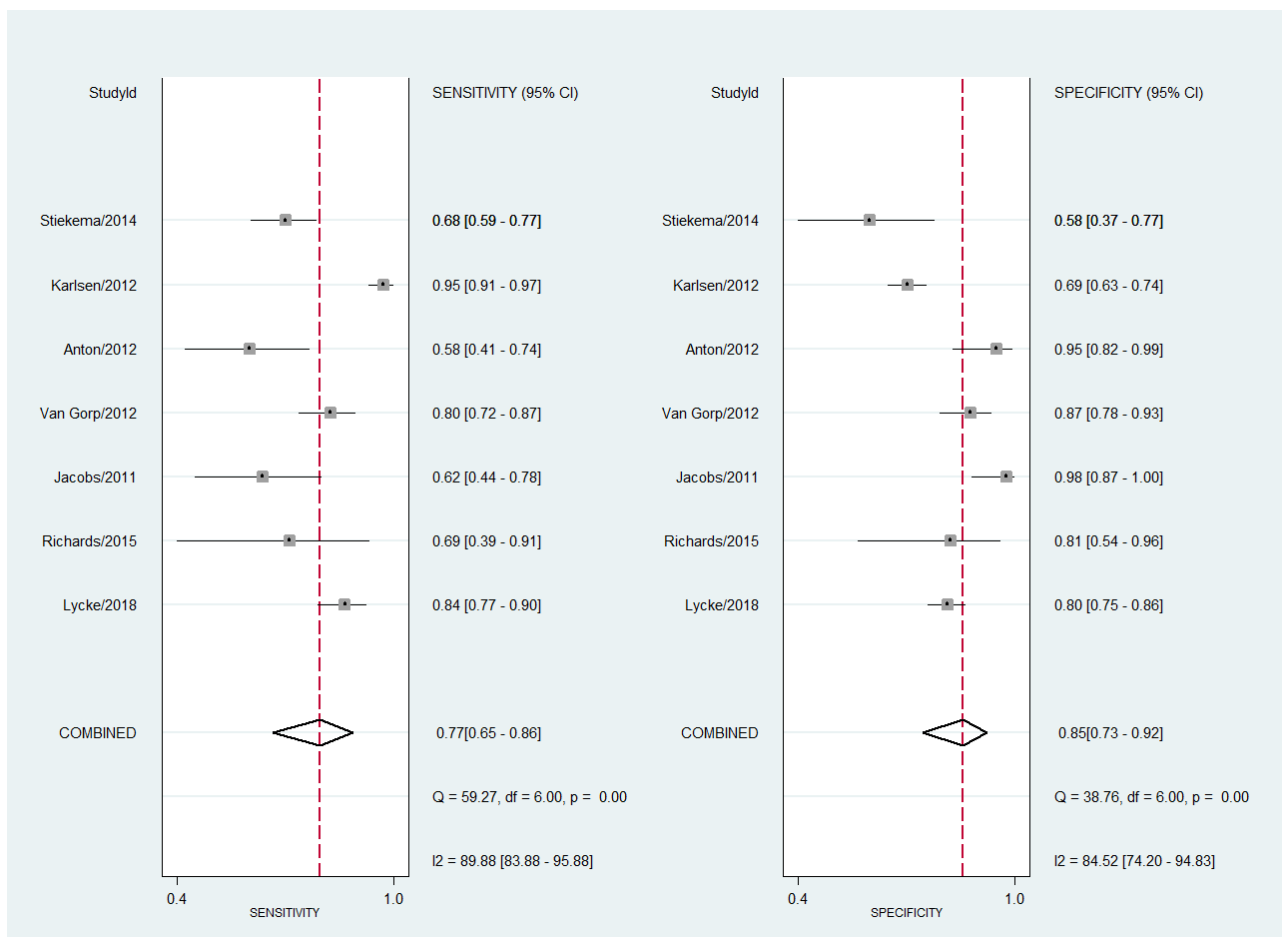

Figure S5. Fagan nomogram for detecting ovarian cancer for ROMA (A) and RMI (B) in postmenopausal women.

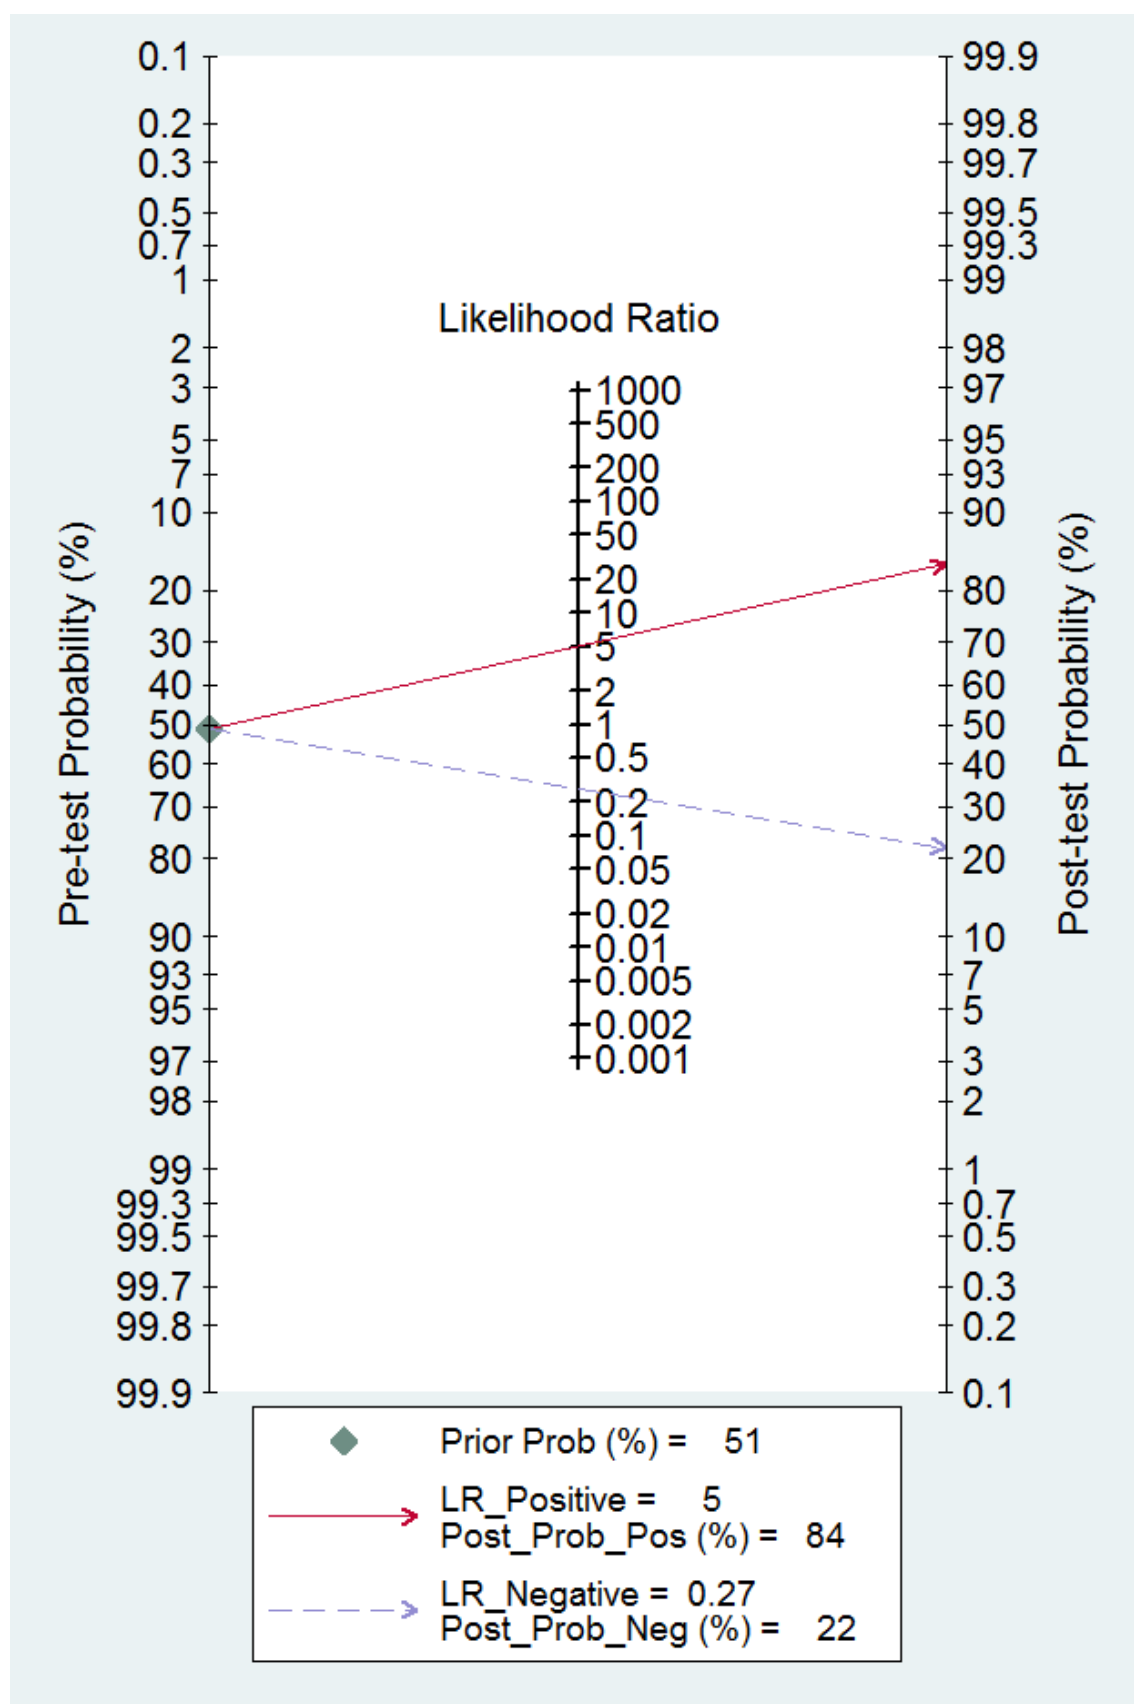



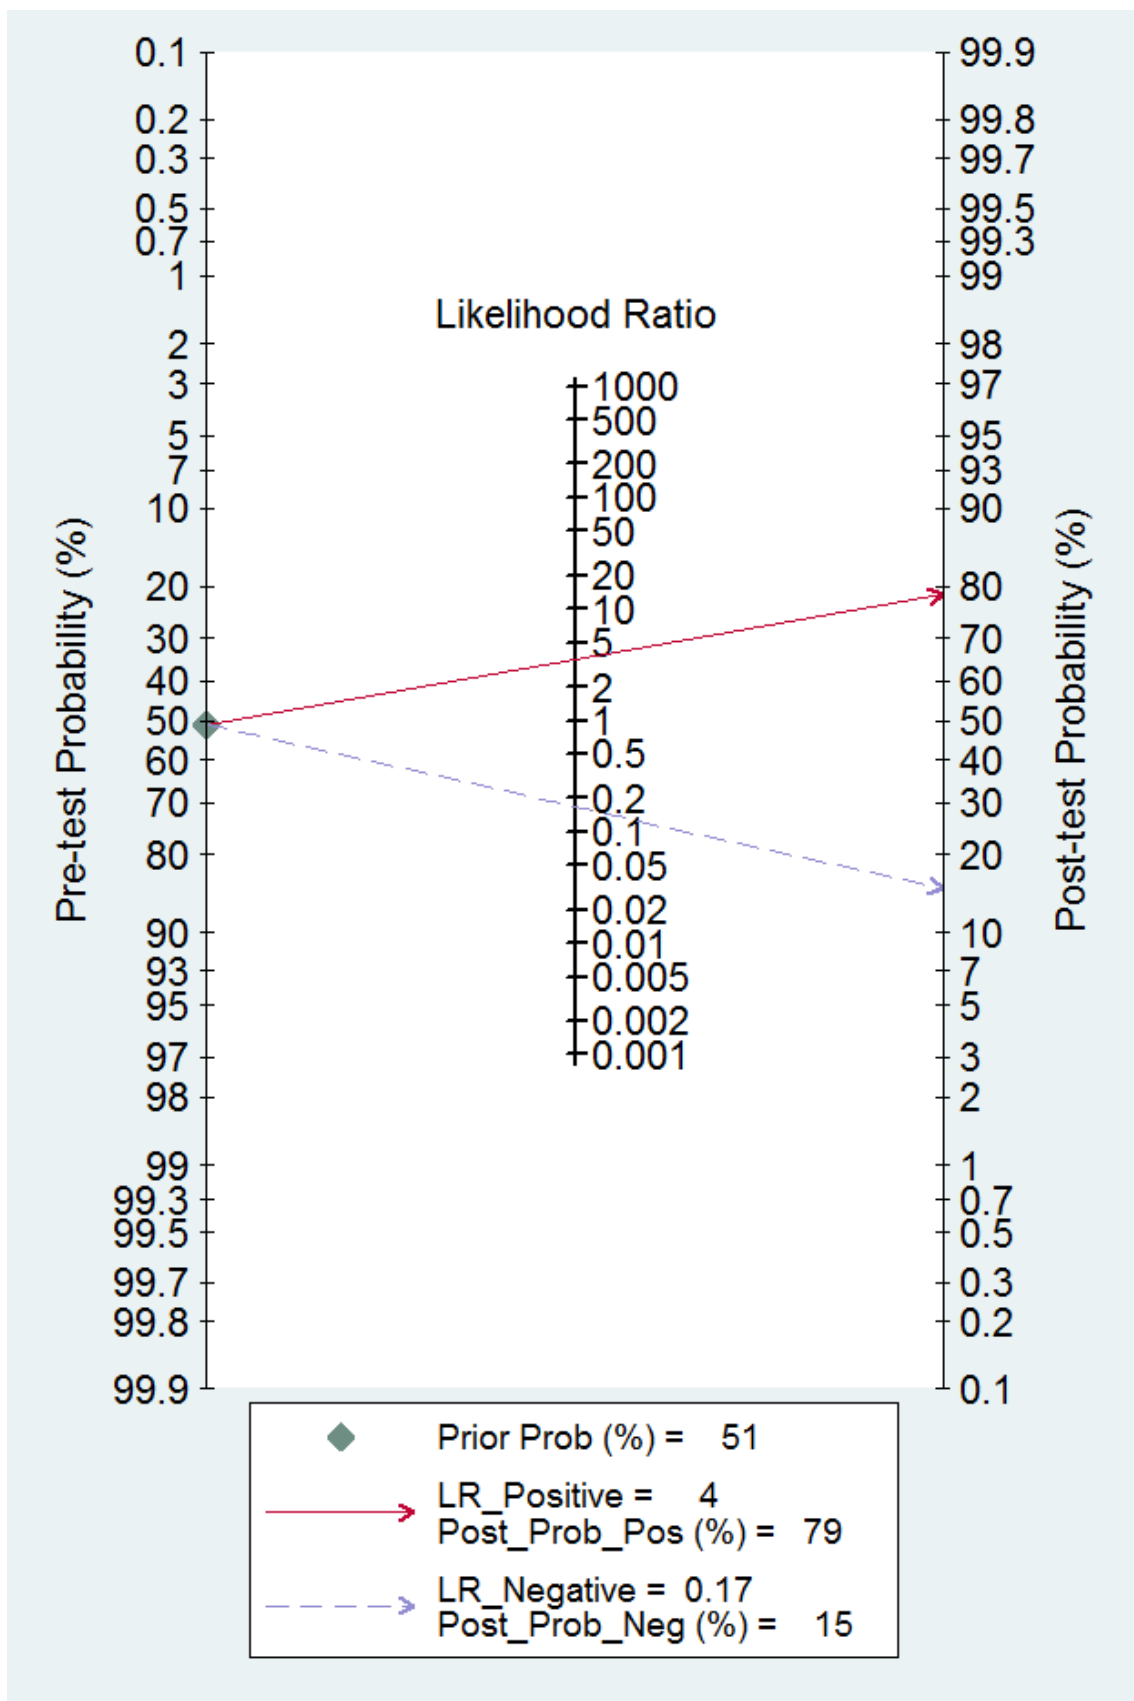

Supplement: Supplementary file 1 [file 16289753]
